# Supplementary material for: Facile rearrangement of molecular layer deposited metalcone thin films by electron beam irradiation for area selective atomic layer deposition
Source: Royal Society of Chemistry journal article supplement (doi:10.1039/d1dt01380g), 2021-01-01
Supplement: d1dt01380g1.pdf [file d1dt01380g1.pdf]

## Supporting Information

# Facile rearrangement of molecular layer deposited metalcone thin film by electron beam irradiation for area selective atomic layer deposition

Seunghwan Lee,<sup>‡a</sup> GeonHo Baek,<sup>‡b</sup> Hye-mi Kim,<sup>a</sup> Yong-Hwan Kim<sup>c</sup> and Jin-Seong Park<sup>\*a,b</sup>

<sup>a</sup> Division of Materials Science and Engineering, Hanyang University, 222 Wangsimni-ro, Seongdong-gu, Seoul 04763, Republic of Korea

<sup>b</sup> Division of Nano-Scale Semiconductor Engineering, Hanyang University, 222 Wangsimni-ro, Seongdong-gu, Seoul 04763, Republic of Korea

<sup>c</sup> Infovion Inc., 71 Gyeongin-ro, Yeongdeungpo-gu, Seoul 07286, Republic of Korea

<sup>†</sup>These authors contributed equally to this work. (Seunghwan Lee ([sevenfoku@hanyang.ac.kr](mailto:sevenfoku@hanyang.ac.kr)) and GeonHo Baek ([qorrjsgh00@hanyang.ac.kr](mailto:qorrjsgh00@hanyang.ac.kr)))

\*Corresponding Author: [jsparklime@hanyang.ac.kr](mailto:jsparklime@hanyang.ac.kr)

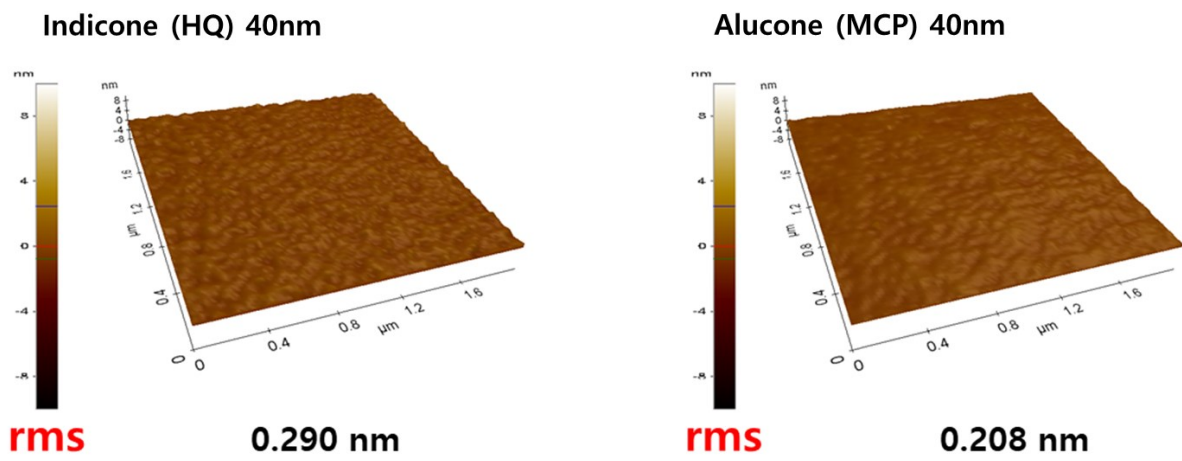

Figure S1. AFM roughness of indicone (HQ) and alucone (4MP) films grown on a Si wafer.

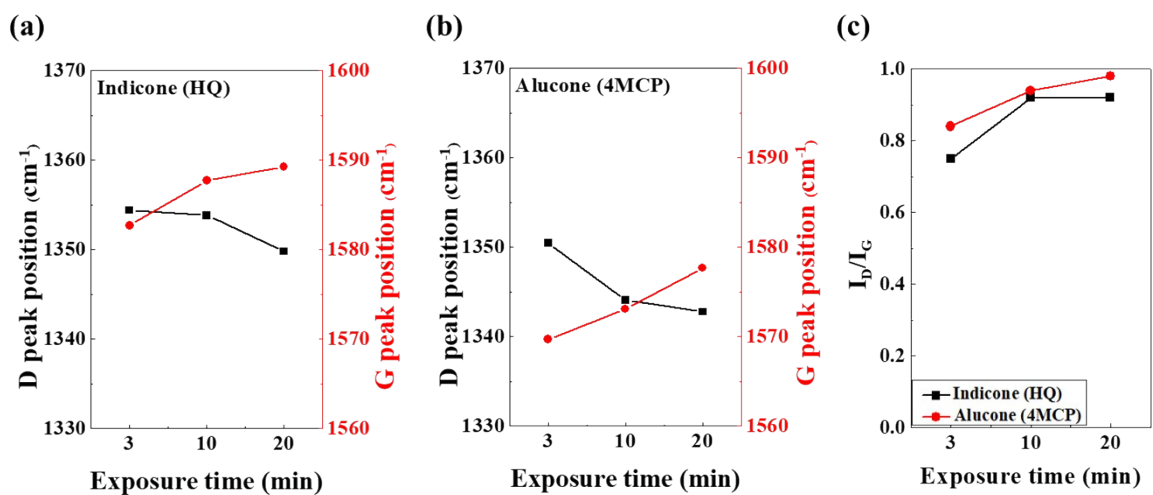

Figure S2. Shift of G band position in (a) indicone (HQ), and (b) alucone (4MP). (c) Intensity ratio of D and G peak in indicone (HQ) and alucone (4MP)
